# Supplementary material for: Defining the minimally clinically important difference of the SF-36 physical function subscale for paediatric CFS/ME: triangulation using three different methods
Source: Springer Nature journal article supplement (doi:10.1186/s12955-018-1028-2), 2018-10-19
Supplement: MOESM1 [file 16213172]

## Minimal Clinically Important Difference (MCID) Topic Guide

### Young Person Topic Guide

#### Minimal Clinically Important Difference (MCID)

*MCID= change in the measure that a child thinks makes a difference to their lives.*

*Get young person to fill out SF36-PFS for how they feel now. Take a red pen and get the young person to mark the SMALLEST AMOUNT the responses would have to change to make a difference to them.*

**What would be the SMALLEST AMOUNT these would have to change by for you to feel like treatment has made a difference to you?**

Prompts: How many responses would have to improve, by how much...

### Parent Topic Guide

#### Minimal Clinically Important Difference (MCID)

*MCID= change in the measure that a child thinks makes a difference to their lives.*

*Present parent with young person's completed SF36-PFS response. Take a red pen and get parent to mark the SMALLEST AMOUNT the responses would have to change to make a difference to them.*

We just asked [child] to complete the questionnaire and these are the answers they gave.

**What would be the SMALLEST AMOUNT these would have to change by for you to feel like treatment has made a difference?**

Prompts: How many responses would have to improve, by how much...
